# Supplementary material
Source: ML conference proceedings conference paper supplement (https://openreview.net/forum?id=2EO8eQ2vySB)
Supplement: supplementary_material [file attachment]

## A Appendix

Table A1: Mappings from DeepSequence alignments to PDB structures.

| Alignment                 | PDB  | chain_idx | aln_s | aln_e | pdb_s | pdb_e |
|---------------------------|------|-----------|-------|-------|-------|-------|
| AMIE_PSEAE_1_b0           | 2uxy | 0         | 0     | 341   | 0     | 341   |
| B3VI55_LIPSTSTABLE_1_b0   | 4zfv | 1         | 9     | 439   | 0     | 430   |
| B3VI55_LIPST_1_b0         | 4zfv | 1         | 9     | 439   | 0     | 430   |
| BG_STRSQ_1_b0             | 1gnx | 0         | 14    | 478   | 0     | 464   |
| BLAT_ECOLX_1_b0           | 1s0w | 0         | 0     | 263   | 0     | 263   |
| BRCA1_HUMAN_1_b0          | 1jm7 | 0         | 0     | 103   | 0     | 103   |
| BRCA1_HUMAN_BRCT_1_b0     | 4u4a | 0         | 21    | 235   | 0     | 214   |
| CALM1_HUMAN_1_b0          | 3sjq | 0         | 1     | 148   | 0     | 147   |
| DLG4_RAT_2_b0             | 2xkx | 0         | 0     | 101   | 296   | 397   |
| DYR_ECOLI_1_b0            | 5uio | 0         | 0     | 159   | 1     | 160   |
| F7YBW7_MESOW_1_b0         | 5ceg | 1         | 0     | 103   | 0     | 103   |
| FYN_HUMAN_1_b0            | 3uf4 | 0         | 5     | 66    | 0     | 61    |
| GAL4_YEAST_1_b0           | 3coq | 0         | 7     | 75    | 0     | 68    |
| HG_FLU_1_b0               | 6mya | 4         | 16    | 508   | 0     | 493   |
| HIS7_YEAST_1_b0           | 6ezm | 0         | 2     | 219   | 0     | 217   |
| HSP82_YEAST_1_b0          | 2cg9 | 0         | 1     | 216   | 0     | 215   |
| IF1_ECOLI_1_b0            | 1ah9 | 0         | 1     | 72    | 0     | 71    |
| KKA2_KLEPN_1_b0           | 1nd4 | 0         | 9     | 264   | 0     | 255   |
| MK01_HUMAN_1_b0           | 7opm | 0         | 0     | 360   | 2     | 362   |
| MTH3_HAEAESTABILIZED_1_b0 | 3ubt | 0         | 0     | 328   | 0     | 328   |
| P84126_THETH_1_b0         | 1vc4 | 0         | 0     | 254   | 0     | 254   |
| PABP_YEAST_1_b0           | 6r5k | 1         | 0     | 96    | 77    | 173   |
| PA_FLU_1_b0               | 7nj7 | 0         | 0     | 716   | 0     | 716   |
| POLG_HCVJF_1_b0           | 3fqq | 0         | 32    | 114   | 1     | 83    |
| POL_HV1N5-CA_1_b0         | 6wap | 0         | 0     | 231   | 0     | 231   |
| PTEN_HUMAN_1_b0           | 7jvx | 0         | 6     | 351   | 0     | 345   |
| PYP_HALHA_1_b0            | 4bbv | 0         | 0     | 125   | 0     | 125   |
| RASH_HUMAN_1_b0           | 4q2l | 0         | 0     | 169   | 0     | 169   |
| RL401_YEAST_1_b0          | 6zqh | 1         | 0     | 76    | 0     | 76    |
| SUMO1_HUMAN_1_b0          | 1a5r | 0         | 0     | 101   | 2     | 103   |
| TPK1_HUMAN_1_b0           | 3s4y | 0         | 15    | 242   | 0     | 227   |
| TPMT_HUMAN_1_b0           | 2h1l | 0         | 16    | 245   | 0     | 229   |
| TRPC_SULSO_1_b0           | 1igs | 0         | 1     | 248   | 0     | 247   |
| TRPC_THEMA_1_b0           | 1i4n | 0         | 1     | 252   | 0     | 251   |
| TRY2_RAT_1_b0             | 3fp6 | 0         | 0     | 223   | 0     | 233   |
| UBC9_HUMAN_1_b0           | 2xwu | 0         | 0     | 158   | 0     | 158   |
| UBE4B_MOUSE_1_b0          | 2kre | 0         | 8     | 104   | 4     | 100   |
| YAP1_HUMAN_1_b0           | 2ltw | 0         | 0     | 36    | 0     | 36    |

Table A2: Zero-shot performance on *de novo* miniproteins from Rocklin et al. [2017], broken out by fold.

| Fold                  | Pearson correlation |      |        |
|-----------------------|---------------------|------|--------|
|                       | CARP-640M           | MIF  | MIF-ST |
| HHH <sub>138</sub>    | 0.41                | 0.46 | 0.52   |
| HHH <sub>134</sub>    | 0.36                | 0.45 | 0.48   |
| HEEH <sub>872</sub>   | 0.23                | 0.37 | 0.41   |
| HEEH <sub>726</sub>   | 0.21                | 0.26 | 0.25   |
| HEEH <sub>223</sub>   | 0.22                | 0.53 | 0.56   |
| HEEH <sub>779</sub>   | 0.50                | 0.55 | 0.62   |
| EEHEE <sub>1498</sub> | 0.10                | 0.36 | 0.32   |
| EEHEE <sub>37</sub>   | 0.41                | 0.65 | 0.68   |
| EEHEE <sub>1716</sub> | 0.22                | 0.60 | 0.60   |
| EEHEE <sub>1702</sub> | 0.03                | 0.26 | 0.24   |

Table A3: Zero-shot Spearman rank correlation on GB1 broken out by number of mutations.

| Model     | PDB  |      |       |       | AF2  |      |       |       |
|-----------|------|------|-------|-------|------|------|-------|-------|
|           | 1    | 2    | 3     | 4     | 1    | 2    | 3     | 4     |
| CARP-640M | 0.19 | 0.12 | -0.01 | -0.01 | 0.19 | 0.12 | -0.01 | -0.01 |
| MIF       | 0.83 | 0.64 | 0.42  | 0.11  | 0.84 | 0.66 | 0.44  | 0.15  |
| MIF-ST    | 0.76 | 0.62 | 0.41  | 0.11  | 0.83 | 0.67 | 0.44  | 0.15  |
